# Supplementary material for: Clinical Risk Factors and Microbiological and Intestinal Characteristics of Carbapenemase-Producing Enterobacteriaceae Colonization and Subsequent Infection
Source: PubMed Central journal article supplement (PMC9769896; doi:10.1128/spectrum.01906-21), 2022-11-29
Supplement: spectrum.01906-21-s0001.pdf [file spectrum.01906-21-s0001.pdf]

Supplementary Tab 1. List of primer for detection of genes used in this study.

| <b>Target genes</b> | <b>Primer name</b>       | <b>Sequence 5'-3'</b>     | <b>Size/Annealing temp</b> |
|---------------------|--------------------------|---------------------------|----------------------------|
| KPC-2               | bla <sub>KPC-2</sub> -F  | GCTACACCTAGCTCCACCTTC     | 989bp/53°C                 |
|                     | bla <sub>KPC-2</sub> -R  | ACAGTGGTTGGTAATCCATGC     |                            |
| NDM-1               | bla <sub>NDM-1</sub> -F  | CAGCACACTTCCTATCTC        | 292bp/52°C                 |
|                     | bla <sub>NDM-1</sub> -R  | CCGCAACCATCCCCTCTT        |                            |
| IMP                 | bla <sub>IMP</sub> -F    | CTACCGCAGCAGAGTCTTTG      | 587bp/58°C                 |
|                     | bla <sub>IMP</sub> -R    | AACCAGTTTTGCCTTACCAT      |                            |
| VIM-2               | bla <sub>VIM-2</sub> -F  | GTAAATTATTGGTCATTTGACCGTC | 743bp/52°C                 |
|                     | bla <sub>VIM-2</sub> -R  | CGTTGTGTGCTTGAGCAAGTC     |                            |
| OXA-48              | bla <sub>OXA-48</sub> -F | TTGGTGGCATCGATTATCGG      | 744bp/58°C                 |
|                     | bla <sub>OXA-48</sub> -R | GAGCACTTCTTTTGTGATGGC     |                            |

Supplementary Tab 2. Univariate analysis of risk factors for CRE colonization.

| Risk factors                            | CRE rectal carriers (N=54) | non-colonized patients (N=320) | <i>P</i> value (OR[CI 95%])  |
|-----------------------------------------|----------------------------|--------------------------------|------------------------------|
| <b>Age, years</b>                       |                            |                                |                              |
| 18-60                                   | 22 (40.7)                  | 152 (47.5)                     | 0.357 (0.760 [0.423-1.365])  |
| 60-80                                   | 15 (27.8)                  | 130 (40.6)                     | 0.073 (0.562 [0.298-1.062])  |
| >80                                     | 16 (29.6)                  | 28 (8.8)                       | <0.001 (4.391 [2.178-8.852]) |
| Sex, male                               | 36 (66.7)                  | 169 (52.8)                     | 0.058 (1.787 [0.974-3.279])  |
| <b>Hospitalization history</b>          |                            |                                |                              |
| in the 6 months before screening        | 37(68.5)                   | 190 (59.4)                     | 0.203 (1.489 [0.804-2.757])  |
| 3 or more co-morbid conditions          | 28 (51.9)                  | 42 (13.1)                      | <0.001 (7.128[3.817-13.313]) |
| APACHE II score $\geq$ 21               | 33 (61.1)                  | 111 (34.7)                     | <0.001 (2.959[1.634-5.357])  |
| Carriage or infection with another MDRO | 32 (59.3)                  | 31 (9.7)                       | <0.001(13.560[7.028-26.162]) |
| Invasive procedures                     | 31 (57.4)                  | 180 (56.3)                     | 0.874 (1.048[0.585-1.878])   |
| Carbapenem use                          | 15 (27.8)                  | 32 (10.0)                      | <0.001 (3.462 [1.721-6.961]) |
| Cefoperazone/sulbactam use              | 14(25.9)                   | 83(25.9)                       | 0.999 (0.999 [0.518-1.930])  |
| Piperacillin/tazobactam use             | 6(11.1)                    | 51(15.9)                       | 0.361 (0.659[0.268-1.622])   |
| Vancomycin use                          | 6(11.1)                    | 15(4.7)                        | 0.058 (2.542[0.940-6.871])   |

|             |          |           |                            |
|-------------|----------|-----------|----------------------------|
| Hormone use | 3(5.6)   | 11(3.4)   | 0.448 (1.652[0.446-6.127]) |
| PPI use     | 27(50.0) | 153(47.8) | 0.766 (1.092[0.613-1.943]) |

---
